# Supplementary material for: Sequestration of LINE‐1 in cytosolic aggregates by MOV10 restricts retrotransposition
Source: PubMed Central journal article supplement — EMBO Rep. 2022 Jul 20;23(9):e54458. doi: 10.15252/embr.202154458 (PMC9442310; doi:10.15252/embr.202154458), 2022-07-20
Supplement: EMBR-23-e54458-s009.pdf [file EMBR-23-e54458-s009.pdf]

Appendix

Manuscript ID :EMBOR-2021-54458V2

## **Table of Contents**

Appendix Fig S1. Indirect immunofluorescence ORF1p + UPF1

Pg 2

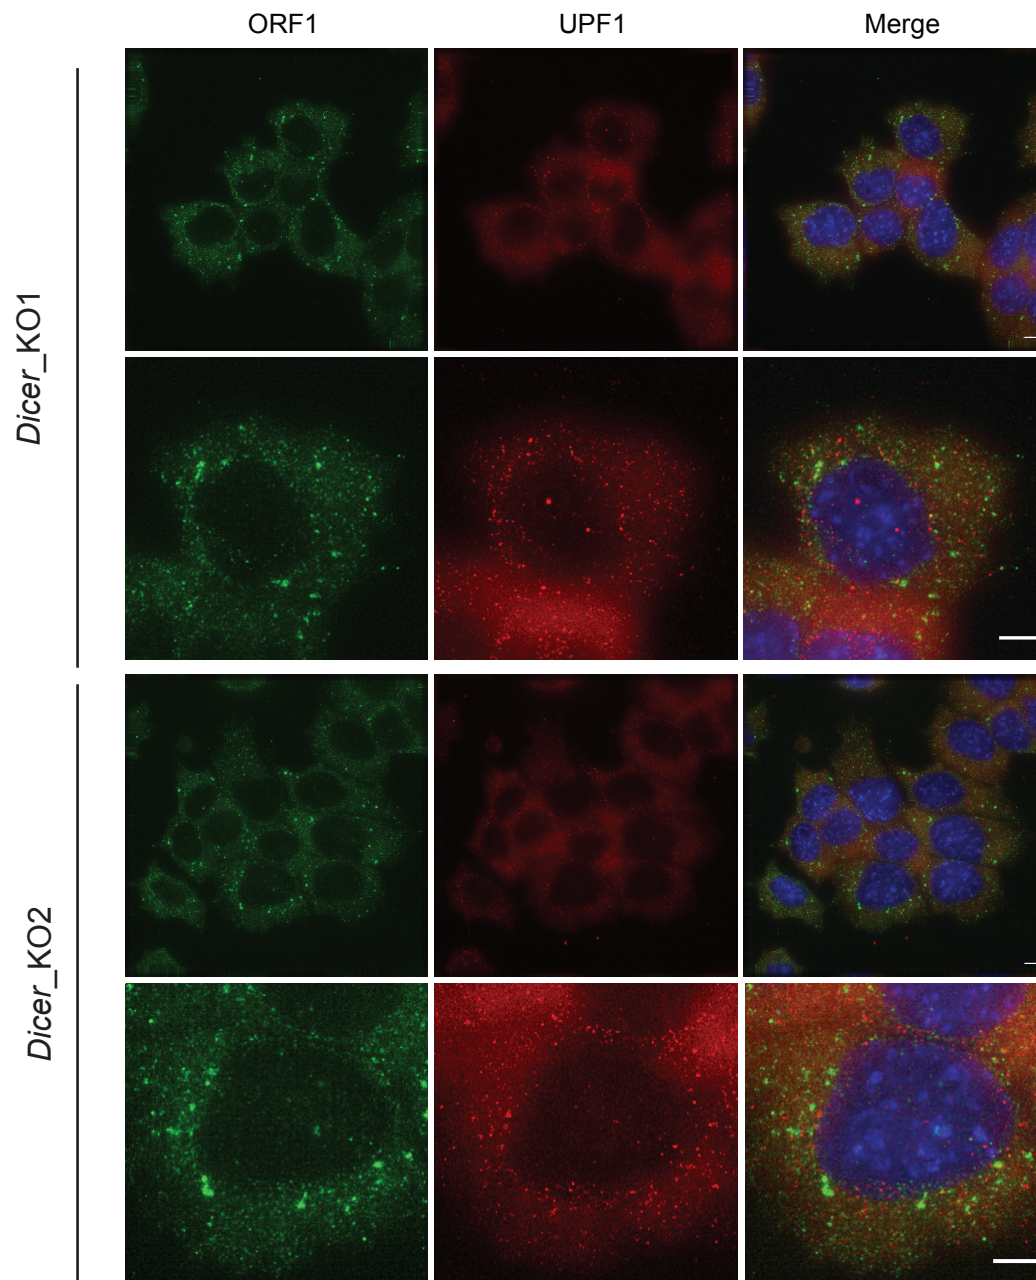

Maximum intensity projections across Z stacks of example images from indicated mESCs stained for L1 ORF1p (green) combined with immunostaining for UPF1 (red) and nuclei stained with DAPI (blue). No co-localization of ORF1p and UPF1 was observed. Scale bar 5 $\mu$ m
